# Supplementary material
Source: publisher site journal article supplement (https://www.dovepress.com/article/243329)
Supplement: Supplementary file 1 [file get_supplementary_file.php]

library(foreign)

bc <- read.spss("C:/Users/TangXY/Desktop/SCC.sav", use.value.labels=F, to.data.frame=T)

bc <- na.omit(bc)

library(rms)

dd <- datadist(bc)

options(datadist="dd")

f <- cph(Surv(OS, Status1) ~ FOXo3a + Lymphnode, x=T, y=T, surv=T, data=bc, time.inc=365)

surv <- Survival(f)

bc$FOXo3a<-factor(bc$FOXo3a,levels=c(0,1),labels=c("low","high"))

bc$Lymphnode<-factor(bc$Lymphnode,levels=c(0,1),labels=c("negative","positive"))

nom <- nomogram(f, fun=list(function(x) surv(365*1, x), function(x) surv(365*3, x)), lp=F, funlabel=c("1-year overall survival", "3-year overall survival"), maxscale=10, fun.at=c(0.95, 0.9, 0.85, 0.8, 0.75, 0.7, 0.6, 0.5))

plot(nom)

print(nom)

FOXo3a Points

0 10

1 0

Lymphnode Points

0 0

1 10

Total Points 1-year overall survival

11 0.95

15 0.90

17 0.85

19 0.80

20 0.75

21 0.70

Total Points 3-year overall survival

5 0.95

9 0.90

12 0.85

13 0.80

15 0.75

16 0.70

18 0.60

20 0.50

validate(f, method="boot", B=1000, dxy=T)

rcorrcens(Surv(OS, Status1) ~ predict(f), data = bc)

Divergence or singularity in 1 samples

index.orig training test optimism index.corrected n

Dxy 0.6155 0.6395 0.6141 0.0254 0.5901 999

R2 0.2679 0.2948 0.2509 0.0439 0.2239 999

Slope 1.0000 1.0000 0.8822 0.1178 0.8822 999

D 0.1533 0.1736 0.1421 0.0315 0.1218 999

U -0.0137 -0.0145 0.0313 -0.0458 0.0321 999

Q 0.1670 0.1881 0.1108 0.0773 0.0897 999

g 1.4522 2.0704 1.4401 0.6303 0.8220 999

C Dxy aDxy SD Z P n

predict(f) 0.192 -0.616 0.616 0.093 6.62 0 103

f1 <- cph(Surv(OS, Status1) ~ FOXo3a + Lymphnode, x=T, y=T, surv=T, data=bc, time.inc=365*1)

cal1 <- calibrate(f1, cmethod="KM", method="boot", u=365*1, m=50, B=500)

plot(cal1)

plot(cal1, lwd=2, lty=1, errbar.col=c(rgb(0,118,192,maxColorValue=255)), xlim=c(0.8,1),ylim=c(0.7,1),xlab="Nomogram-Predicted Probability of 1-Year OS",ylab="Actual 1-Year OS(proportion)",col=c(rgb(192,98,83,maxColorValue=255)))

f3 <- cph(Surv(OS, Status1) ~ FOXo3a + Lymphnode, x=T, y=T, surv=T, data=bc, time.inc=365*3)

cal3 <- calibrate(f3, cmethod="KM", method="boot", u=365*3, m=50, B=500)

plot(cal3, lwd=2, lty=1, errbar.col=c(rgb(0,118,192,maxColorValue=255)), xlim=c(0.6,1),ylim=c(0.6,1),

xlab="Nomogram-Predicted Probability of 3-Year OS",ylab="Actual 3-Year OS(proportion)",col=c(rgb(192,98,83,maxColorValue=255)))

rfs<- cph(Surv(RFS, Status2) ~ FOXo3a + Lymphnode, x=T, y=T, surv=T, data=bc, time.inc=365)

surv <- Survival(rfs)

nom2 <- nomogram(rfs, fun=list(function(x) surv(365*1, x), function(x) surv(365*3, x)), lp=F, funlabel=c("1-year recurrence-free survival", "3-year recurrence-free survival"), maxscale=10, fun.at=c(0.95, 0.9, 0.85, 0.8, 0.75, 0.7, 0.6, 0.5))

plot(nom2)

print(nom2)

FOXo3a Points

0 10

1 0

Lymphnode Points

0 0

1 10

Total Points 1-year recurrence-free survival

9 0.95

13 0.90

16 0.85

17 0.80

19 0.75

20 0.70

Total Points 3-year recurrence-free survival

5 0.95

9 0.90

12 0.85

13 0.80

15 0.75

16 0.70

18 0.60

20 0.50

validate(rfs, method="boot", B=1000, dxy=T)

rcorrcens(Surv(RFS, Status2) ~ predict(rfs), data = bc)

index.orig training test optimism index.corrected n

Dxy 0.6155 0.6330 0.6141 0.0189 0.5966 1000

R2 0.2679 0.2891 0.2511 0.0380 0.2299 1000

Slope 1.0000 1.0000 0.9009 0.0991 0.9009 1000

D 0.1533 0.1701 0.1423 0.0278 0.1255 1000

U -0.0137 -0.0145 0.0311 -0.0455 0.0318 1000

Q 0.1670 0.1845 0.1112 0.0733 0.0937 1000

g 1.4525 2.0557 1.4439 0.6119 0.8407 1000

> rcorrcens(Surv(RFS, Status2) ~ predict(rfs), data = bc)

Somers' Rank Correlation for Censored Data Response variable:Surv(RFS, Status2)

C Dxy aDxy SD Z P n

predict(rfs) 0.192 -0.616 0.616 0.093 6.61 0 103

rfs1 <- cph(Surv(RFS, Status2) ~ FOXo3a + Lymphnode, x=T, y=T, surv=T, data=bc, time.inc=365*1)

cur1 <- calibrate(rfs1, cmethod="KM", method="boot", u=365*1, m=50, B=500)

plot(cur1)

plot(cur1, lwd=2, lty=1, errbar.col=c(rgb(0,118,192,maxColorValue=255)), xlim=c(0.6,1),ylim=c(0.6,1),xlab="Nomogram-Predicted Probability of 1-Year RFS",ylab="Actual 1-Year RFS(proportion)",col=c(rgb(192,98,83,maxColorValue=255)))

rfs3 <- cph(Surv(RFS, Status2) ~ FOXo3a + Lymphnode, x=T, y=T, surv=T, data=bc, time.inc=365*3)

cur3 <- calibrate(rfs3, cmethod="KM", method="boot", u=365*3, m=50, B=500)

plot(cur3)

plot(cur3, lwd=2, lty=1, errbar.col=c(rgb(0,118,192,maxColorValue=255)), xlim=c(0.6,1),ylim=c(0.4,1),xlab="Nomogram-Predicted Probability of 3-Year RFS",ylab="Actual 3-Year RFS(proportion)",col=c(rgb(192,98,83,maxColorValue=255)))
